# Supplementary material for: Topical application of RTA 408 lotion activates Nrf2 in human skin and is well-tolerated by healthy human volunteers
Source: PubMed Central journal article supplement (PMC4501113; doi:10.1186/s12895-015-0029-7), 2015-07-14

# Additional file 1: Figure S1

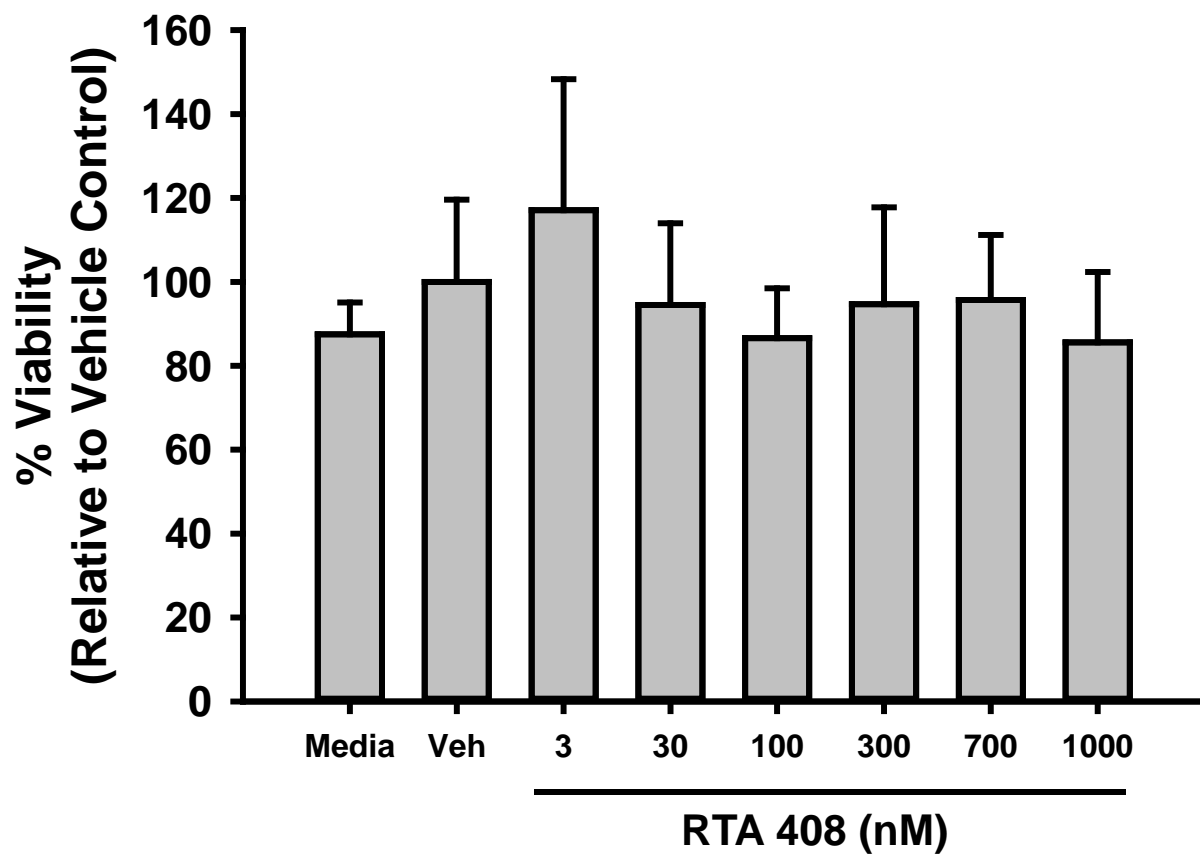

Supplement: 12895_2015_29_MOESM1_ESM.pdf [file 12895_2015_29_MOESM1_ESM.pdf]
